# Supplementary material for: A highly stable and efficient carbon electrode-based perovskite solar cell achieved via interfacial growth of 2D PEA2PbI4 perovskite
Source: Royal Society of Chemistry journal article supplement (doi:10.1039/c8ta09433k), 2018-01-01
Supplement: c8ta09433k1.pdf [file c8ta09433k1.pdf]

Electronic Supplementary Information (ESI) for

**Highly stable and efficient carbon electrode-based perovskite  
solar cell *via* interfacial growth of 2D perovskite**

Kisu Lee<sup>a‡</sup>, Jungwon Kim<sup>a‡</sup>, Haejun Yu<sup>a</sup>, Jong Woo Lee<sup>b</sup>, Chang-Min Yoon<sup>a</sup>, Seong Keun Kim<sup>b</sup>, and Jyongsik Jang<sup>a\*</sup>

<sup>a</sup> School of Chemical and Biological Engineering, College of Engineering, Seoul National University, 1 Gwanak-ro, Gwanak-gu, Seoul 08826, Republic of Korea

Fax: +82-2-888-1604; Tel: 82-2-880-7069; E-mail: [jsjang@plaza.snu.ac.kr](mailto:jsjang@plaza.snu.ac.kr)

<sup>b</sup> Department of Chemistry, Seoul National University, 1 Gwanak-ro, Gwanak-gu, Seoul 08826, Republic of Korea

‡ These authors contributed equally to this work.

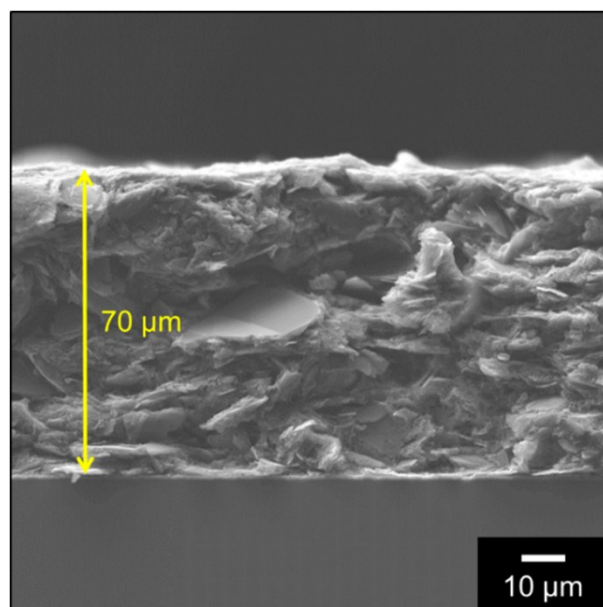

**Figure S1.** Cross-sectional FE-SEM image of the carbon electrode.

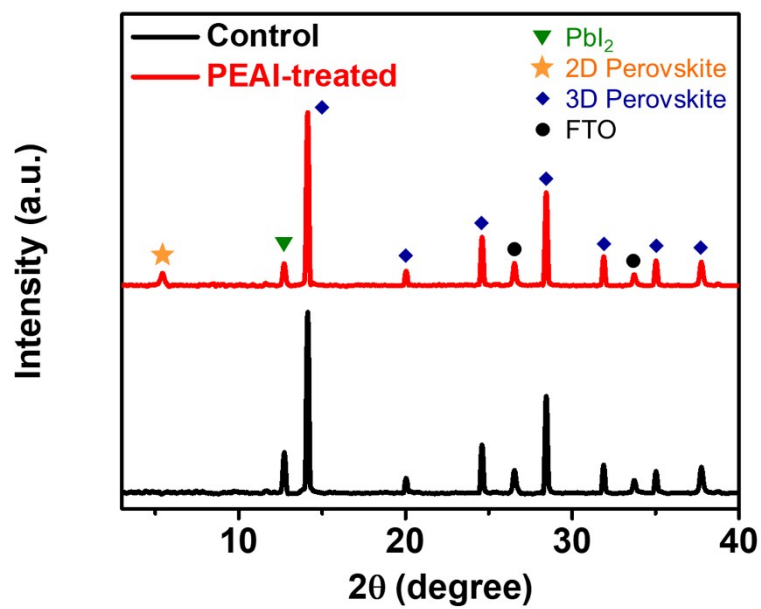

**Figure S2.** XRD patterns of the perovskite films w/o and with PEAI treatment. Note that the carbon layer was peeled back to reveal the perovskite layer underneath for measurement.

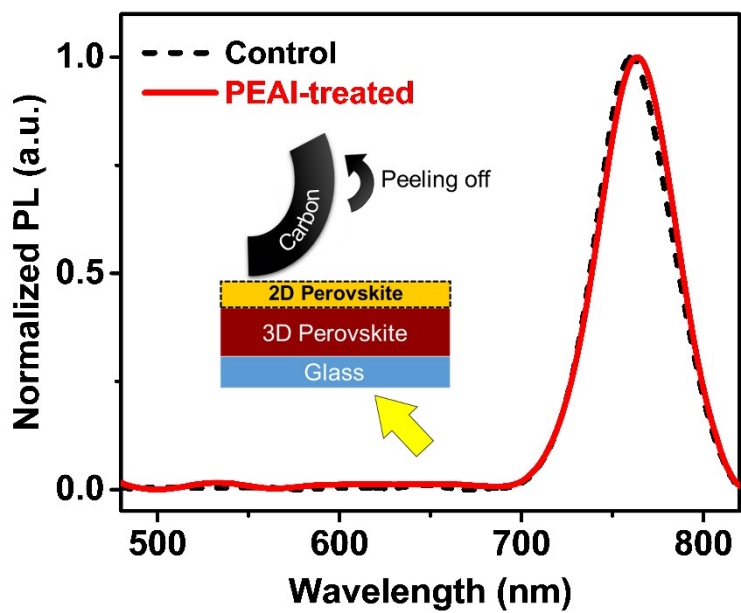

**Figure S3.** Steady-state PL spectra of the perovskite films w/o and with PEAI treatment. Samples were excited from the glass side by light irradiation at 430 nm. The carbon layer was peeled back to eliminate its quenching effect.

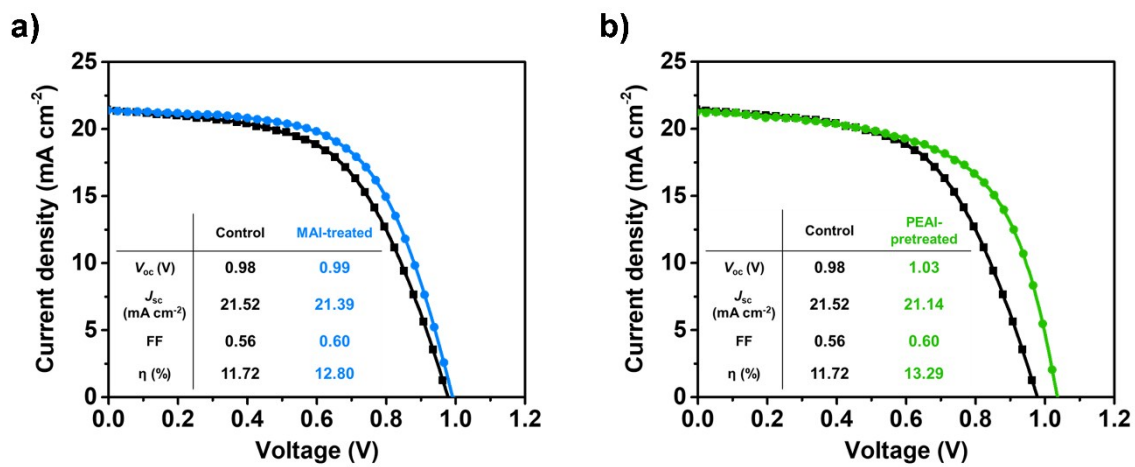

**Figure S4.**  $J$ - $V$  characteristic comparison for carbon-based PSCs (a) with MAI treatment and (b) PEAI pre-treatment.

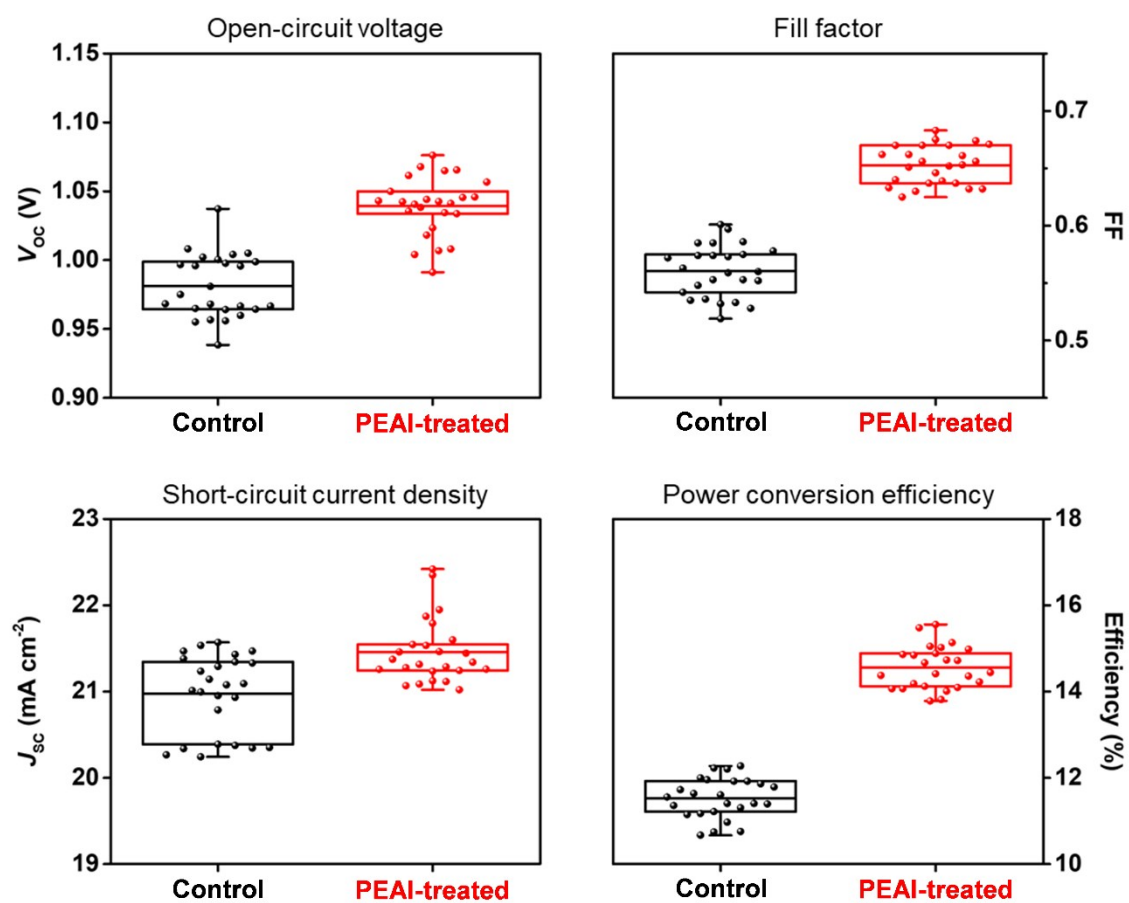

**Figure S5.** Distribution of photovoltaic parameters ( $V_{oc}$ , FF,  $J_{sc}$ , and PCE) of carbon-based PSCs w/o and with PEAI treatment. The mean values are marked as solid line in the boxes.

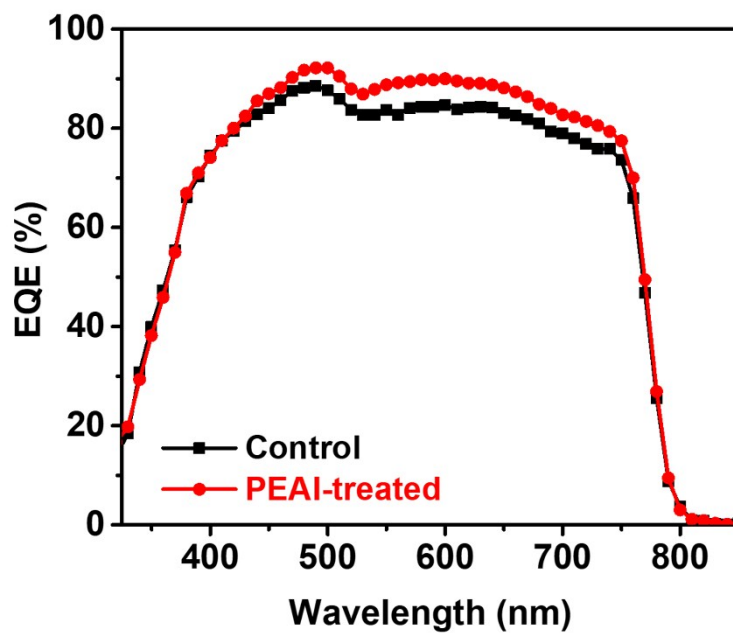

**Figure S6.** Incident photon-to-current efficiency (IPCE) spectra for carbon-based PSCs w/o and with PEAI treatment. The integrated  $J_{sc}$  are 20.54 and 21.56  $\text{mA cm}^{-2}$ , respectively.

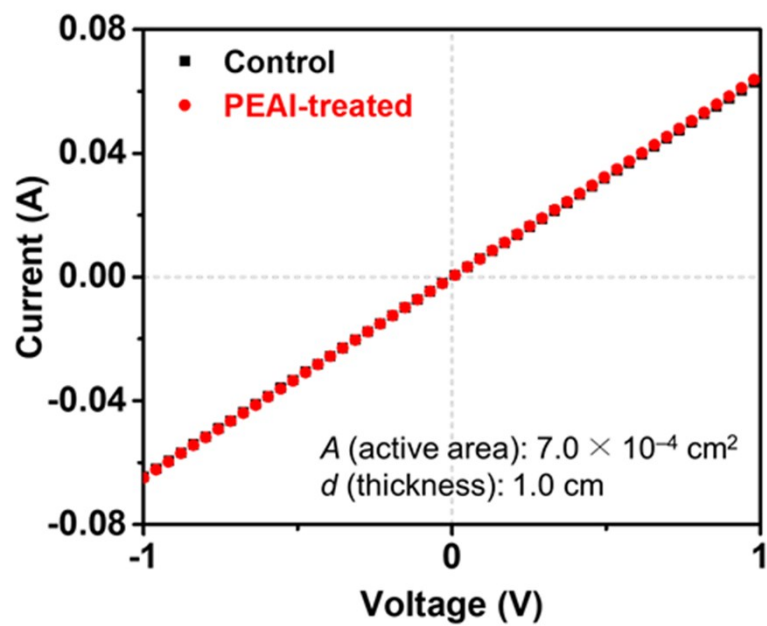

**Figure S7.** Current–voltage ( $I$ – $V$ ) characteristics for carbon electrodes w/o and with PEAI treatment.



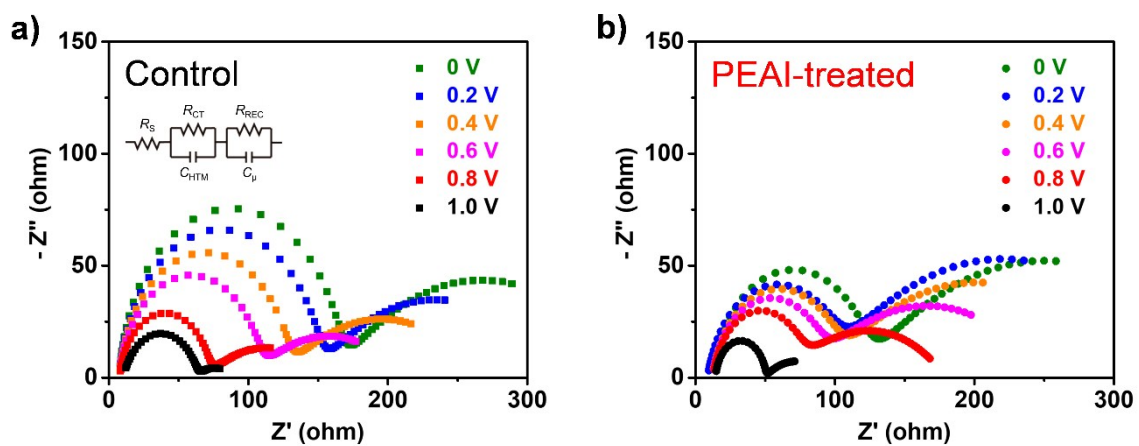

**Figure S8.** Nyquist plots for PSCs (a) w/o and (b) with PEAI treatment measured under illumination at different applied bias ranged from 0 V to 1.0 V. The scanning frequency ranged from 1 Hz to 1 MHz. The inset shows the equivalent circuit.

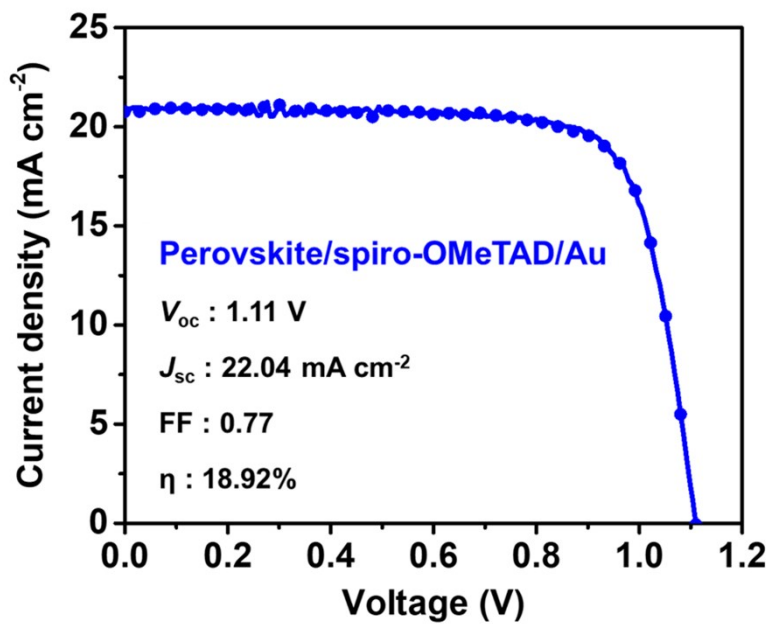

**Figure S9.**  $J$ - $V$  characteristic for a conventional PSC with FTO/TiO<sub>2</sub>/3D perovskite/spiro-OMeTAD/Au structure.

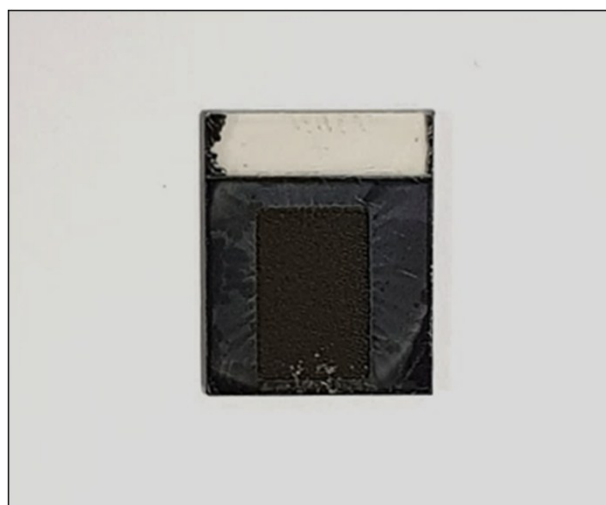

**Figure S10.** A digital photograph of our carbon-based PSC with PEAI treatment.

**Table S1.** Time-resolved PL decay parameters for the perovskite films w/o and with PEAI treatment. The bi-exponential decay equation was used for fitting the curves.

| Sample                                   | $\tau_1$ (ns) | $\tau_2$ (ns) | <sup>a)</sup> $\tau_{\text{avg}}$ (ns) | $A_1$ | $A_2$ |
|------------------------------------------|---------------|---------------|----------------------------------------|-------|-------|
| Glass/3D perovskite                      | 3.1           | 83.0          | 81.7                                   | 0.21  | 0.47  |
| Glass/3D perovskite/carbon               | 4.8           | 43.3          | 41.3                                   | 0.30  | 0.60  |
| Glass/3D perovskite/2D interlayer        | 2.4           | 95.6          | 95.2                                   | 0.09  | 0.46  |
| Glass/3D perovskite/2D interlayer/carbon | 4.8           | 39.2          | 36.9                                   | 0.32  | 0.55  |

<sup>a)</sup>  $\tau_{\text{avg}} = \sum_i A_i \tau_i^2 / \sum_i A_i \tau_i$

**Table S2.** Electrochemical impedance spectroscopy (EIS) parameters for the PSCs w/o and with PEAI treatment, obtained from the Nyquist plots in Figure S8.

| Device       | $V_{\text{app}}$ (V) | $R_S$ (ohm) | $R_{CT}$ (ohm)     | $R_{REC}$ (ohm)    |
|--------------|----------------------|-------------|--------------------|--------------------|
| Control      | 0                    | 7.46        | $1.55 \times 10^2$ | $2.09 \times 10^2$ |
|              | 0.2                  | 7.37        | $1.41 \times 10^2$ | $1.71 \times 10^2$ |
|              | 0.4                  | 7.41        | $1.17 \times 10^2$ | $1.41 \times 10^2$ |
|              | 0.6                  | 7.43        | $0.97 \times 10^2$ | $1.05 \times 10^2$ |
|              | 0.8                  | 7.39        | $0.62 \times 10^2$ | $0.88 \times 10^2$ |
|              | 1.0                  | 10.4        | $0.52 \times 10^2$ | $0.25 \times 10^2$ |
| PEAI-treated | 0                    | 11.8        | $1.08 \times 10^2$ | $2.62 \times 10^2$ |
|              | 0.2                  | 8.53        | $0.86 \times 10^2$ | $2.51 \times 10^2$ |
|              | 0.4                  | 11.8        | $0.84 \times 10^2$ | $2.12 \times 10^2$ |
|              | 0.6                  | 12.0        | $0.72 \times 10^2$ | $1.65 \times 10^2$ |
|              | 0.8                  | 12.3        | $0.57 \times 10^2$ | $1.10 \times 10^2$ |
|              | 1.0                  | 14.3        | $0.45 \times 10^2$ | $0.35 \times 10^2$ |
